# Supplementary material
Source: PubMed Central journal article supplement (PMC6958553)
Supplement: NIHMS1044419-supplement-Supplemental_Material.pdf [file NIHMS1044419-supplement-Supplemental_Material.pdf]

**Supplementary Table 1**

*Relationship with Mothers: Means, Standard Deviation, and Bivariate Correlations of Key Variables at Wave 1*

|                              | Mean<br>(SD)       | (1)    | (2)    | (3)    | (4)   | (5)    | (6)   | (7)    | (8)    | (9)   | (10)   | (11)   | (12)  | (13)   | (14)  | (15)   | (16) | (17) |  |
|------------------------------|--------------------|--------|--------|--------|-------|--------|-------|--------|--------|-------|--------|--------|-------|--------|-------|--------|------|------|--|
| (1) Psychological well-being | 4.9 (0.7)          | 1.00   |        |        |       |        |       |        |        |       |        |        |       |        |       |        |      |      |  |
| (2) Depressive symptoms      | 0.81<br>(0.42)     | -0.56* | 1.00   |        |       |        |       |        |        |       |        |        |       |        |       |        |      |      |  |
| (3) Father verbal abuse      | 0.10<br>(0.29)     | -0.03  | 0.08*  | 1.00   |       |        |       |        |        |       |        |        |       |        |       |        |      |      |  |
| (4) Mother verbal abuse      | 0.05<br>(0.22)     | 0.02   | 0.04*  | 0.18*  | 1.00  |        |       |        |        |       |        |        |       |        |       |        |      |      |  |
| (5) Father physical abuse    | 0.12<br>(0.33)     | -0.06* | 0.07*  | 0.51*  | 0.15* | 1.00   |       |        |        |       |        |        |       |        |       |        |      |      |  |
| (6) Mother physical abuse    | 0.08<br>(0.28)     | 0.00   | 0.03   | 0.18*  | 0.47* | 0.42*  | 1.00  |        |        |       |        |        |       |        |       |        |      |      |  |
| (7) Neglected                | 0.12<br>(0.32)     | -0.07* | 0.09*  | 0.29*  | 0.24* | 0.29*  | 0.28* | 1.00   |        |       |        |        |       |        |       |        |      |      |  |
| (8) Closeness                | 3.48<br>(0.65)     | 0.08*  | -0.02  | -0.09* | 0.19* | 0.08*  | 0.20* | 0.17*  | 1.00   |       |        |        |       |        |       |        |      |      |  |
| (9) Contact                  | 107.56<br>(119.02) | 0.01   | 0.02   | -0.06* | 0.06* | 0.08*  | 0.06* | 0.06*  | 0.25*  | 1.00  |        |        |       |        |       |        |      |      |  |
| (10) Support Exchange        | 0.62<br>(0.49)     | 0.09*  | -0.03  | -0.04* | 0.04* | -0.03  | -0.03 | -0.05* | 0.18*  | 0.32* | 1.00   |        |       |        |       |        |      |      |  |
| (11) Male                    | 0.46<br>(0.50)     | 0.06*  | 0.08*  | 0.03*  | 0.10* | 0.03   | 0.05* | 0.02   | 0.12*  | 0.25* | 0.14*  | 1.00   |       |        |       |        |      |      |  |
| (12) Birth year              | 38.87<br>(0.49)    | 0.04*  | -0.04* | 0.01   | -0.00 | -0.02  | -0.02 | -0.04* | 0.02   | 0.03  | 0.03*  | -0.09* | 1.00  |        |       |        |      |      |  |
| (13) Education               | 13.66<br>(2.29)    | 0.11*  | -0.08* | 0.03   | 0.00  | -0.00  | -0.01 | -0.04* | 0.07*  | 0.10* | 0.06*  | 0.15*  | 0.14* | 1.00   |       |        |      |      |  |
| (14) Father's Education      | 9.94<br>(3.39)     | 0.07*  | -0.06* | 0.01   | 0.02  | -0.01  | -0.00 | -0.04* | -0.01  | -0.02 | 0.03   | 0.00   | 0.08* | 0.34*  | 1.00  |        |      |      |  |
| (15) Other adversity         | 0.28<br>(0.55)     | 0.02   | 0.06*  | 0.31   | 0.18* | 0.31*  | 0.23* | 0.03*  | -0.10* | -0.04 | -0.04* | -0.05* | -0.02 | -0.01  | 0.01  | 1.00   |      |      |  |
| (16) Married                 | 0.82<br>(0.38)     | 0.04*  | -0.12* | -0.02  | -0.02 | 0.00   | 0.00  | -0.01  | -0.03  | -0.02 | -0.02  | 0.08*  | 0.02  | -0.05* | -0.01 | -0.01  | 1.00 |      |  |
| (17) Good Health             | 0.89<br>(0.31)     | 0.19*  | -0.27* | -0.04* | -0.01 | -0.05* | -0.01 | -0.07* | 0.00   | -0.04 | 0.00   | 0.01   | 0.03* | 0.09*  | 0.06* | -0.04* | 0.03 | 1.00 |  |

Note.  $N = 4,696$  (Wave 1). Significance levels are denoted as \*  $p < .05$ .

**Supplementary Table 2**

*Relationship with Fathers: Means, Standard Deviation, and Bivariate Correlations of Key Variables at Wave 1*

|                              | Mean<br>(SD)      | (1)    | (2)    | (3)    | (4)    | (5)    | (6)    | (7)    | (8)   | (9)   | (10)  | (11)  | (12)  | (13)  | (14)  | (15)  | (16) | (17) |  |
|------------------------------|-------------------|--------|--------|--------|--------|--------|--------|--------|-------|-------|-------|-------|-------|-------|-------|-------|------|------|--|
| (1) Psychological well-being | 4.91<br>(0.67)    | 1.00   |        |        |        |        |        |        |       |       |       |       |       |       |       |       |      |      |  |
| (2) Depressive symptoms      | 0.83<br>(0.42)    | -0.54* | 1.00   |        |        |        |        |        |       |       |       |       |       |       |       |       |      |      |  |
| (3) Father verbal abuse      | 0.10<br>(0.29)    | -0.06* | 0.09*  | 1.00   |        |        |        |        |       |       |       |       |       |       |       |       |      |      |  |
| (4) Mother verbal abuse      | 0.05<br>(0.23)    | -0.01  | 0.06*  | 0.17*  | 1.00   |        |        |        |       |       |       |       |       |       |       |       |      |      |  |
| (5) Father physical abuse    | 0.13<br>(0.34)    | -0.06* | 0.10*  | 0.52*  | 0.14*  | 1.00   |        |        |       |       |       |       |       |       |       |       |      |      |  |
| (6) Mother physical abuse    | 0.09<br>(0.29)    | -0.01  | 0.04   | 0.15*  | 0.50*  | 0.38*  | 1.00   |        |       |       |       |       |       |       |       |       |      |      |  |
| (7) Neglected                | 0.11<br>(0.31)    | -0.06* | 0.11*  | 0.33*  | 0.28*  | 0.29*  | 0.33*  | 1.00   |       |       |       |       |       |       |       |       |      |      |  |
| (8) Closeness                | 3.38<br>(0.71)    | 0.10*  | -0.05  | -0.26* | 0.09*  | 0.18*  | 0.14*  | 0.22*  | 1.00  |       |       |       |       |       |       |       |      |      |  |
| (9) Contact                  | 86.47<br>(105.53) | 0.01   | -0.01  | -0.11* | -0.10* | -0.13* | -0.12* | -0.10* | 0.25* | 1.00  |       |       |       |       |       |       |      |      |  |
| (10) Support Exchange        | 0.60<br>(0.49)    | 0.09*  | -0.02  | -0.03  | -0.00  | -0.03  | -0.02  | -0.00  | 0.12* | 0.27* | 1.00  |       |       |       |       |       |      |      |  |
| (11) Male                    | 0.47<br>(0.50)    | -0.06* | 0.11*  | 0.01   | -0.10* | 0.01   | -0.04  | -0.01  | 0.07* | 0.14* | 0.08* | 1.00  |       |       |       |       |      |      |  |
| (12) Birth year              | 38.89<br>(0.48)   | 0.02   | -0.02  | 0.00   | 0.01   | -0.03  | -0.00  | -0.01  | 0.02  | 0.00  | 0.01  | 0.09* | 1.00  |       |       |       |      |      |  |
| (13) Education               | 13.79<br>(2.31)   | 0.13*  | -0.08* | 0.03   | -0.02  | -0.01  | -0.03  | 0.06*  | 0.07* | 0.13* | 0.04  | 0.17* | 0.13* | 1.00  |       |       |      |      |  |
| (14) Father's Education      | 10.26<br>(3.33)   | 0.09*  | -0.04  | -0.01  | -0.03  | -0.06* | -0.03  | -0.05* | 0.04  | -0.04 | 0.04  | 0.04  | 0.08* | 0.36* | 1.00  |       |      |      |  |
| (15) Other adversity         | 0.21<br>(0.49)    | 0.01   | 0.06*  | 0.28*  | 0.16*  | 0.33*  | 0.20*  | 0.29*  | 0.27* | 0.19* | 0.07* | 0.05* | 0.05* | 0.01  | 0.00  | 1.00  |      |      |  |
| (16) Married                 | 0.84<br>(0.37)    | 0.07*  | -0.16* | -0.02  | -0.01  | 0.01   | -0.02  | -0.03  | 0.08* | -0.06 | 0.01  | 0.09* | -0.00 | 0.07* | 0.05* | -0.01 | 1.00 |      |  |
| (17) Good Health             | 0.90<br>(0.30)    | 0.19*  | -0.25* | -0.02  | -0.01  | -0.05  | -0.01  | -0.04  | 0.06  | 0.00  | 0.02  | 0.03  | 0.04  | 0.11* | 0.05* | -0.03 | 0.00 | 1.00 |  |

Note.  $N = 2,134$  (Wave 1). Significance levels are denoted as \*  $p < .05$ .
